# Supplementary material for: Distribution of Lactoferrin Is Related with Dynamics of Neutrophils in Bacterial Infected Mice Intestine
Source: MDPI journal article supplement (doi:10.3390/molecules25071496), 2020-03-25
Supplement: s1 [file s1]

## Supplementary Materials

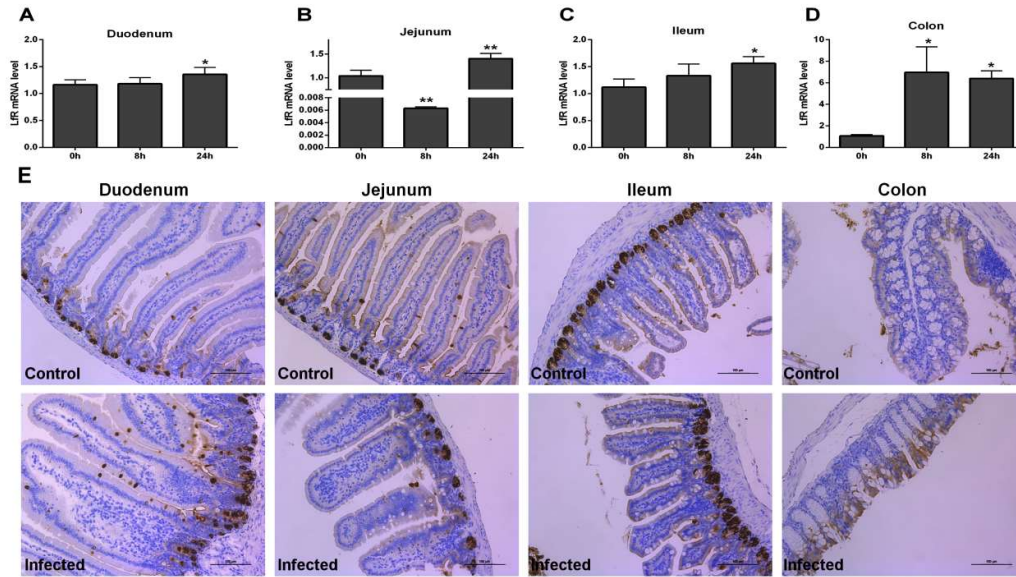

**Figure S1.** LfR expression in mice intestine. **A-D** *E. coli* K88 infection changed the mRNA expression of lactoferrin in mice intestine including duodenum, jejunum, ileum and colon with time differences. **E** Representative immunohistology-stained section from duodenum, jejunum, ileum and colon. Original magnification 400×. Formalin-fixed, paraffin-embedded 5-mm cross-sections were stained with a primary antibody to LfR. Data are presented as the mean  $\pm$  SD, n = 6. The values were normalized against the level of GAPDH gene. \*Indicates a significant difference ( $p < 0.05$ ) and \*\*Indicate an extreme significant difference ( $p < 0.01$ ) compared to that of control group or 0 h post challenge.
